# Supplementary material
Source: HighWire-hosted journal article supplement (https://sti.bmj.com/content/sextrans-2017-053363)
Supplement: inline-supplementary-material-3 [file inline-supplementary-material-3.docx]

*Objectifs:* Il n’existe pas d’estimation du nombre d’hommes ayant des rapports sexuels avec des hommes (HSH) en Suisse, ni de leur répartition géographique. Notre objectif était (1) d’estimer les facteurs de concentration et la taille de la population des HSH dans 83 régions postales suisses, y compris les neuf plus grandes villes de Suisse, et (2) de calculer la prévalence locale du VIH et les taux annuels de VIH et de VHC diagnostiqués, de syphilis et de gonorrhée.

*Méthodes:* Nous avons triangulé des données provenant d'estimations de la population générale, d'enquêtes en ligne sur les HSH, de données publiées sur la prévalence du VIH et de données de notification suisses pour le VIH et les maladies sexuellement transmissibles. Nous avons comparé deux formules différentes pour l'estimation des populations locales de HSH et calculé des intervalles bayésiens crédibles à 95% (ICr) pour chaque région postale.

*Résultats:* Pour toute la Suisse, nous estimons que la population des HSH de 15 à 64 ans compte environ 80 000 hommes (ICr 95% :64 000 à 96 000). (1) En Suisse, les HSH étaient les plus concentrés dans les cinq plus grandes villes de Suisse : Zurich, Genève, Lausanne, Berne et Bâle. (2) Nous estimons qu'en 2012, 6 300 HSH, soit 8,0%, vivaient avec le VIH (diagnostiqué et non diagnostiqué) et 1 700 HSH, ou 2,2%, avaient une infection à VIH non contrôlée. Entre 2010 et 2013, les taux annuels moyens de VIH, VHC, syphilis et gonorrhée diagnostiqués étaient respectivement de 0,3%, 0,02%, 0,4% et 0,4%.

*Conclusions:* La combinaison des données de la population générale, des enquêtes en ligne auprès des HSH et des données de notification permet de calculer des estimations réalistes des populations locales de HSH et donc des proportions de HSH infectés par le VIH et d'autres IST, avec des implications pour la planification de la prévention, la mise en place de services de santé et le conseil sur le risque VIH / IST. Notre méthodologie pour la Suisse est transférable à d'autres pays disposant de sources de données similaires.
